# Supplementary material
Source: Research Square preprint supplement (doi:10.21203/rs.3.rs-9019513/v1)
Supplement: Supplementary file 1 [file 44ab722d743cf33ab95911b2.docx]

Supporting information for

**Human Adrenal Gland Charts within the Common Coordinate Framework From CT-based Imaging**

**Hao Tang1**†**, Jiao Li2**†**, Yuxuan Qiao3**†**, Lei Qiao3**†**, Qiang Xu1, Kangjia Chen2, Xian Zhou4, Wenji Ni5, Yong Zhong5, Xiao Hu6, Jing Sun1, Jianrui Li1, Zhiliang Long7, Ya Liu1, Chen Chen1, Chi Zhang8, Hongju Wu1, Ming Sun1, Xufang Sun1, Yuting Feng1, Dan Wu1, Zicheng Xiong9, Yinghuan Shi9, Liang Jiang10, Xiaoqing Cheng1, Xiaoping Yang3, Ziwei Nie3,** 🖂**, Wei Liao2,** 🖂**, Zhiqiang Zhang1,9** 🖂

**1Department of Radiology, Affiliated Jinling Hospital, Medical School, Nanjing University, Nanjing, China.**

**2The Clinical Hospital of Chengdu Brain Science Institute, School of Life Science and Technology, University of Electronic Science and Technology of China, Chengdu, China.**

**3School of Mathematics, Nanjing University, Nanjing, China.**

**4Health Management Center, Jiangsu Province Hospital of Chinese Medicine, Nanjing, China.**

**5Department of Health Medicine, Jinling Hospital, Affiliated Hospital of Medical School, Nanjing University, Nanjing, China.**

**6Department of Radiology, The Affiliated Brain Hospital of Nanjing Medical University, Nanjing, China.**

**7School of Psychology, Southwest University, Chongqing, China**

**8Department of Radiology, Liyang People's Hospital, Changzhou, Jiangsu Province, China.**

**9School of Computer Science, Nanjing University, Nanjing, China.**

**10Department of Radiology, Nanjing First Hospital, Nanjing Medical University, Nanjing, China.**

† **These authors contributed equally to this work.**

🖂 **Corresponding authors:**

**Ziwei Nie (nieziwei@nju.edu.cn), Wei Liao (**[**weiliao.wl@gmail.com**](mailto:weiliao.wl@gmail.com)**), Zhiqiang Zhang (zhangzq2001@126.com)**

**Supplementary Methods**

**Healthy participants.** The inclusion criteria were as follows: (1) Age older than 18 years. (2) No history of adrenal-related diseases (e.g., Cushing’s syndrome, primary aldosteronism, pheochromocytoma, etc.), with no abnormal findings on computed tomography (CT) reports. (3) No history of major diseases, including malignant tumors, major organ surgery, severe hepatic or renal dysfunction, autoimmune diseases, etc.; no obvious infection within the past 3 months; and no exposure to glucocorticoids, sex hormones, or other related medications.

**Participants with pathological conditions.** (1) Hypertension was diagnosed in accordance with Chinese guidelines1 as a systolic blood pressure ≥140 mmHg and/or diastolic blood pressure ≥90 mmHg, based on multiple repeated measurements. (2) Inflammatory bowel disease (IBD), including ulcerative colitis and Crohn’s disease, was diagnosed according to the World Gastroenterology Organisation (WGO) guidelines2, with the diagnosis established by colonoscopy, histopathological biopsy, and integrated clinical, endoscopic, and pathological evidence. (3) Depression was diagnosed using the diagnostic criteria of the Diagnostic and Statistical Manual of Mental Disorders, Fifth Edition (DSM-5)3. (4) Stroke was diagnosed was diagnosed according to Chinese guidelines for diagnosis and treatment of acute ischemic stroke 20234, based on the clinical presentation of acute focal or global neurological deficits, confirmed by corresponding lesions on magnetic resonance imaging (MRI).

**Supplementary Figures**

**
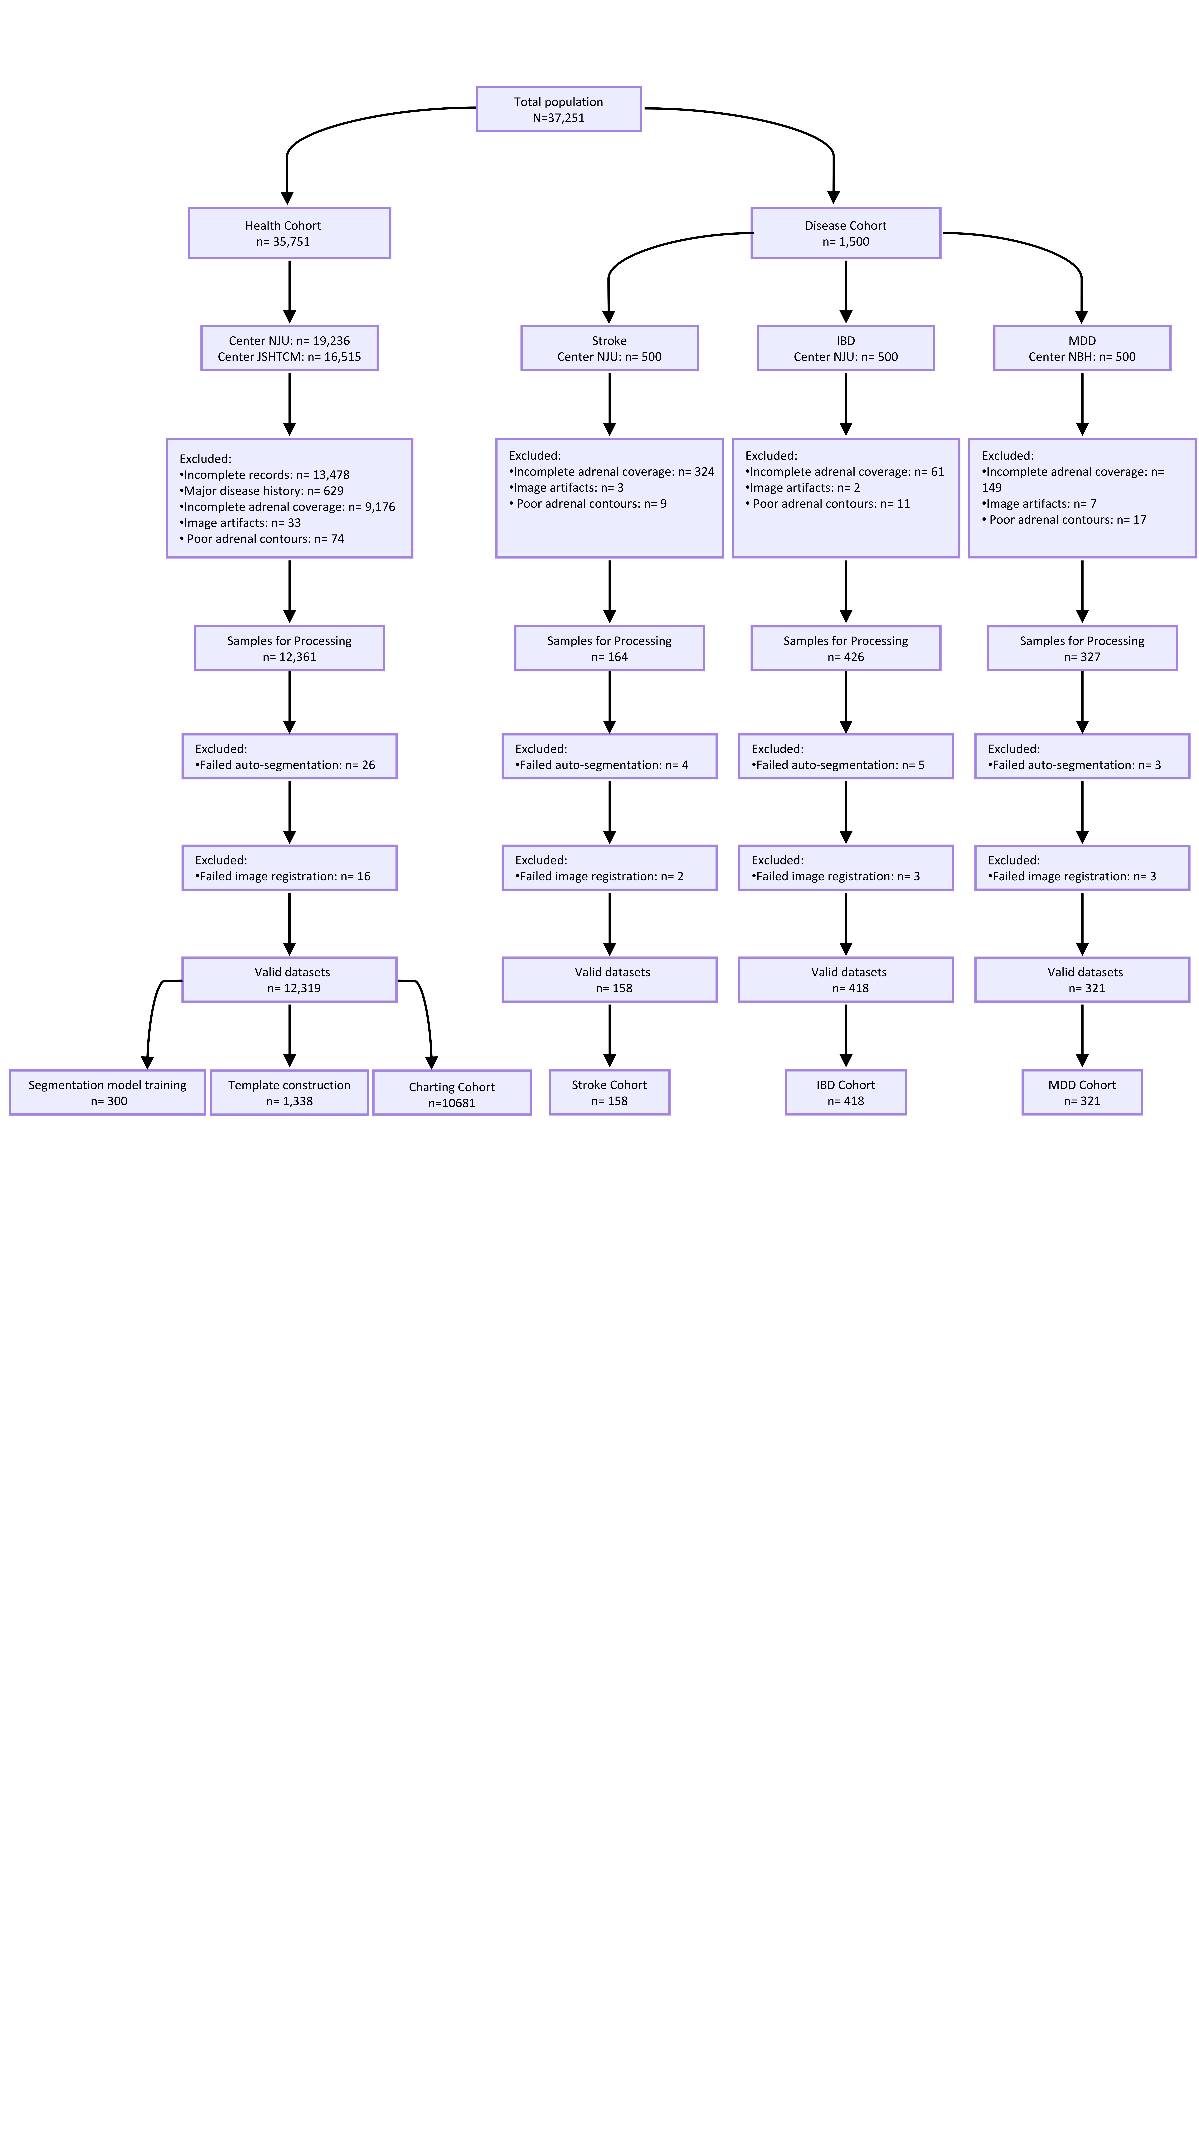
**

**Figure S1. Flowchart of data quality control.** The flowchart outlines the screening and grouping procedures for the healthy and disease cohorts. A total of 37,251 participants were initially enrolled, including 35,751 individuals in the healthy cohort [NJU, Affiliated Jinling Hospital, Medical School of Nanjing University (NJU); Jiangsu Provincial Hospital of Traditional Chinese Medicine (JSHTCM)], of whom 6,727 had a documented history of hypertension, and 1,500 individuals in the disease cohort [500 each for stroke, inflammatory bowel disease (IBD), and major depressive disorder (MDD) from the Affiliated Brain Hospital of Nanjing Medical University (NBH)]. Following sequential exclusions, the final healthy cohort comprised 12,319 subjects eligible for downstream analysis: among these, 300 were allocated to the segmentation model training set, 1,338 to the template construction set, and 10,681 to the healthy statistical analysis (charting) cohort, which included 2,010 individuals with hypertension. In the disease cohort, the final sample sizes were 158 for stroke, 418 for IBD, and 321 for MDD. Additionally, the combined pathological cohort initially included 8,227 individuals, of whom 2,907 were retained after screening.

**
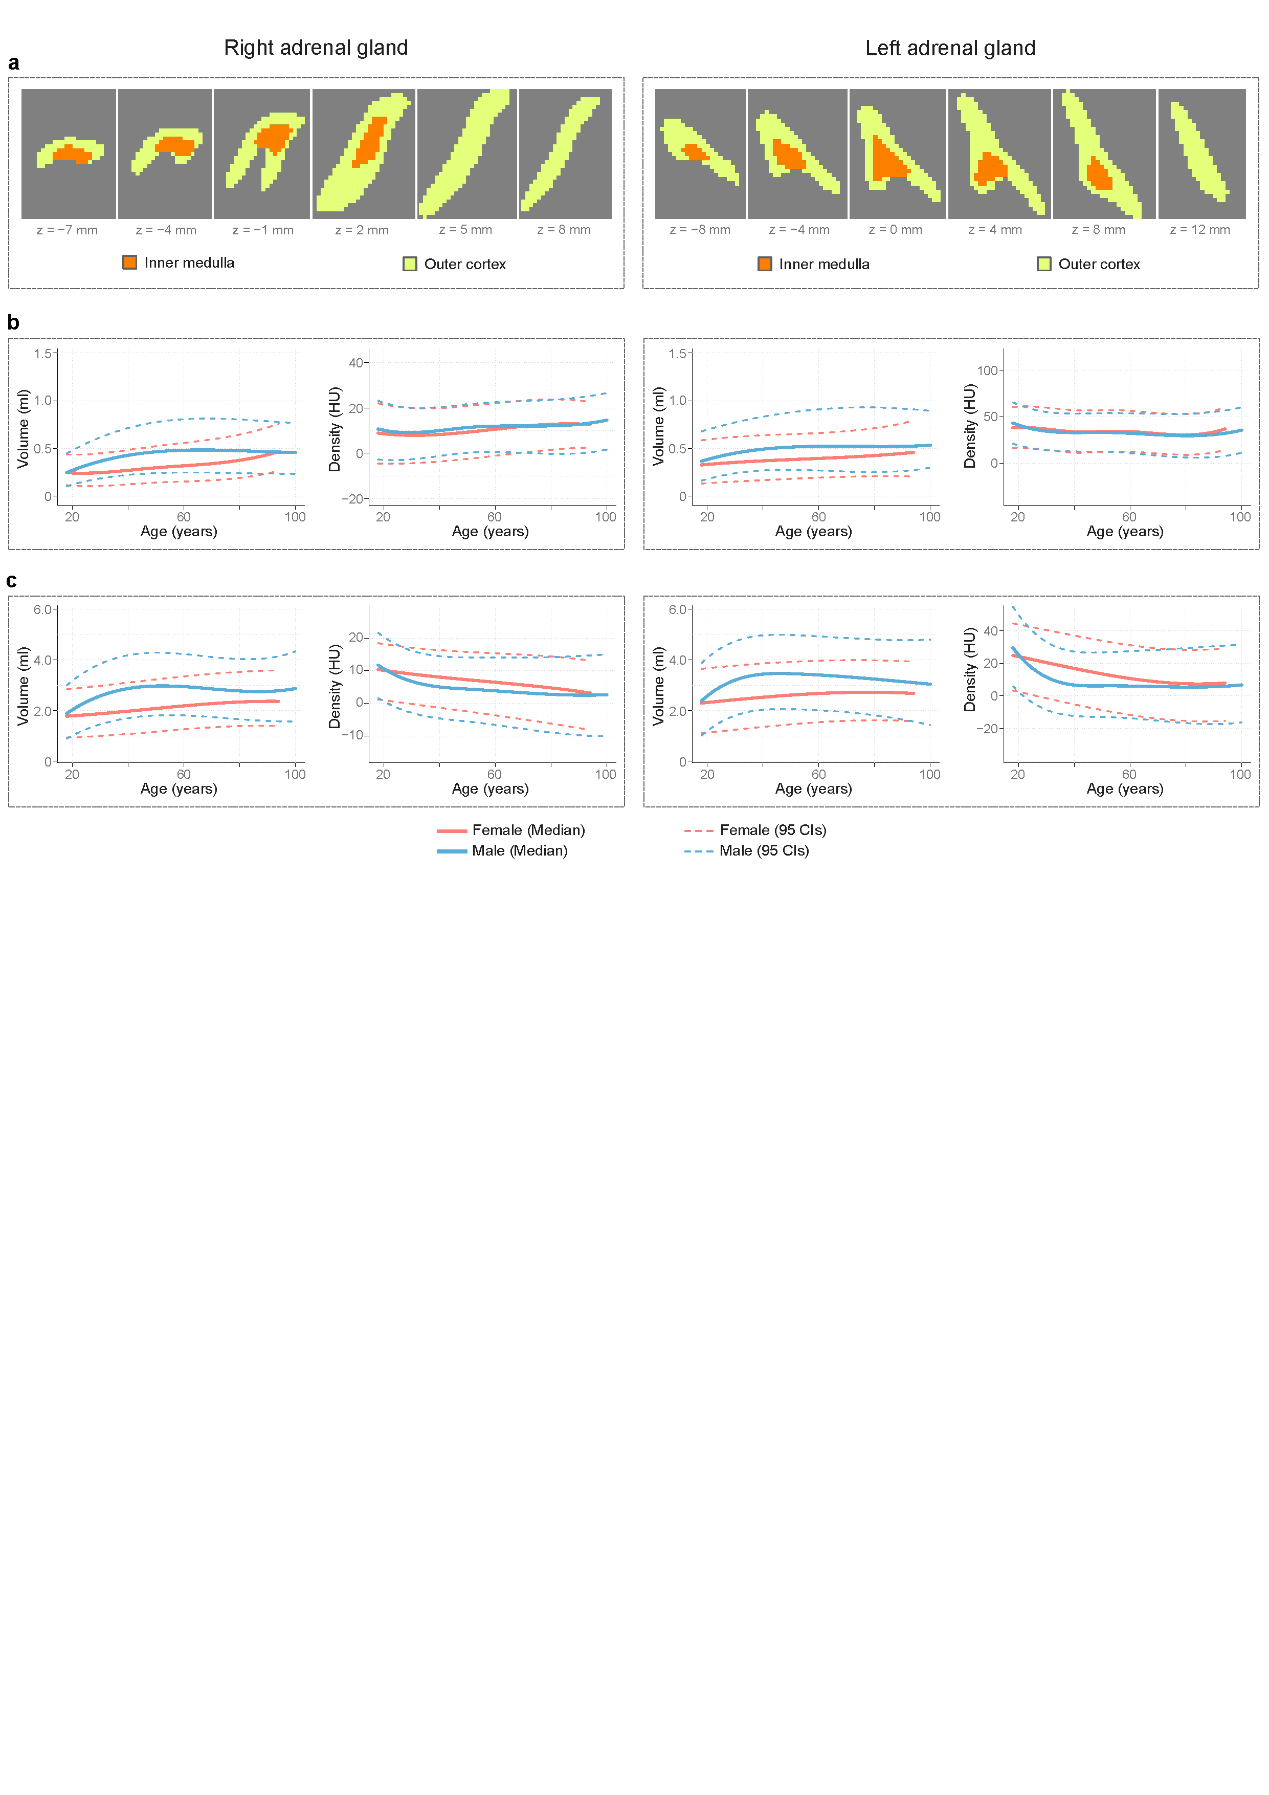
**

**Figure S2. Charts of adrenal volume and density across the lifespan and between sexes within specific regions. a,** The adrenal gland were segmented into inner and outer regions using clustering analysis. **b & c,** Nonlinear associations between age and morphometric measures in the adrenal inner and outer regions. Red and blue colors represent females and males, respectively. Dotted lines indicate 95% confidence intervals.


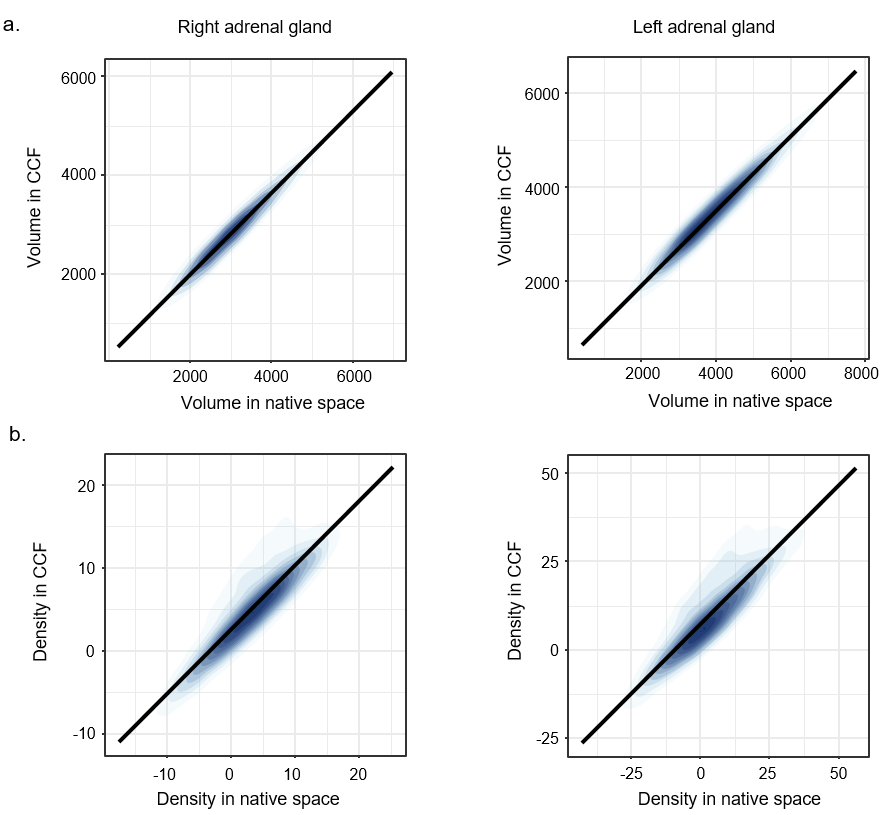


**Figure S3. Correlations of adrenal gland metrics between the common coordinate framework and native space. a,** Scatterplot of the relationship between volume in the common coordinate framework (CCF, y-axis) and native space (x-axis). **b,** Scatterplot of the relationship between density in CCF (y-axis) and native space (x-axis).

**Supplementary Tables**

**Table S1.** Characteristics of the health screening participants.

| Variable | Center A (NJU)  (*N*=4298) | Center B (JSHTCM)  (*N*=6383) |
| --- | --- | --- |
| Age, years | 43.0(31.0,57.0) | 52.0(40.0,61.0) |
| Sex, *n* (%);Female / Male | 1702(39.6)/2596(60.4) | 2472/3911 |
| Height, cm | 168.0(161.0,174.0) | 168.0(162.5,174.0) |
| Weight, kg | 66.0(58.0,74.0) | 68.0(59.0,76.0) |
| BMI, kg/m² | 23.39(21.26,25.39) | 23.78(21.64,26.06) |
| HTN, *n*(%) | 940(21.87%) | 1070(16.76%) |
| RBC, ×10¹²/L(*n*=626 / 6330) | 4.26(3.93,4.69) | 4.75(4.41,5.10) |
| NLR(*n*=425 / 5643) | 1.82(1.45,2.37) | 1.69(1.39,2.09) |
| HR,bpm(*n*=0 / 6126) | __ | 70(66.0,75.0) |

**Abbreviations:** NJU, Affiliated Jinling Hospital, Medical School of Nanjing University; JSHTCM, Jiangsu Provincial Hospital of Traditional Chinese Medicine; BMI, Body Mass Index; HTN, Hypertension; RBC, Red Blood Cell (count); NLR, Neutrophil-to-Lymphocyte Ratio; HR, Heart Rate.

**Note:** Continuous variables are presented as median (P25, P75) and compared using the Mann-Whitney *U* test. Categorical variables are presented as numbers (percentages) and compared using the Chi-square test.For variables with incomplete data, the valid sample sizes are indicated in parentheses after the variable name (format: n=[Center A]/[Center B]). A dash (—) indicates that the data were not collected or are completely missing for that center.

**Table S2.** Characteristics of cases and matched controls.

| Condition | Variable | Present | Control | U or χ² value | *P*-valu*e* |
| --- | --- | --- | --- | --- | --- |
| HTN  (n=2010/8671) | Age | 61.0(53.0,72.0) | 45.0(35.0,57.0) | *U* = 3802288.50 | <0.0001 |
| Sex ,n(%)  Female / Male | 578(28.8)/1432(71.2) | 3596(41.5)/5075(58.5) | χ²=110.91 | <0.0001 |
| Stroke  (n=158/316) | Age | 66.0(58.0,74.0) | 66.0(58.0,74.0) | *U* = 24964.00 | ＞0.999 |
| Sex ,n(%)  Female / Male | 50(31.6)/108(68.4) | 100(31.6)/216(68.4) | χ²＜0.0001 | ＞0.999 |
| IBD  (n=418/836) | Age | 34.0(25.0,47.0) | 34.0(25.0,47.0) | t ＜ 0.0001 | ＞0.999 |
| Sex ,n(%)  Female / Male | 167(40.0)/251(60.0) | 334(40.0)/502(60.0) | χ² ＜ 0.0001 | ＞0.999 |
| MDD  (n=321/642) | Age | 56.0(45.0,64.0) | 56.0(45.0,64.0) | t ＜ 0.0001 | ＞0.999 |
| Sex ,n(%)  Female / Male | 106(33.0)/215(67.0) | 212(33.0)/430(67.0) | χ² ＜ 0.0001 | ＞0.999 |

**Abbreviations**: HTN, Hypertension; IBD, Inflammatory Bowel Disease; MDD, Major Depressive Disorder.

**Note**: For hypertension, the control group includes all participants without hypertension. For Stroke, IBD, and MDD, the control group consists of healthy participants matched 1:2 to the Present group on sex and age. For variables with incomplete data, the valid sample sizes are indicated in parentheses after the variable name (format: n = [condition group] / [control group]). Continuous variables were compared using the two-sample *t*-test or the Mann-Whitney U test, as appropriate. Categorical variables were compared using the Chi-square test.

**Table S3.** Scan parameters of CT data for each center.

| Center | Scanner | Tube Voltage（kV） | Tube Current  (mA) | Scan Mode | Pitch | Reconstruction Slice Thickness  (mm) | Reconstruction Interval  (mm) | Reconstruction Algorithm | Recon FOV  (mm) | Reconstruction Matrix |
| --- | --- | --- | --- | --- | --- | --- | --- | --- | --- | --- |
| NJU | SIEMENS,  SOMATOM Definition Flash | 120 | ATCM,  CARE Dose 4D | Helical Scan | 1.2 | 1.0 | 1.0 | B31f | 300-400 | 512×512 |
| SIEMENS,  SOMATOM Definition | 120 | ATCM,  CARE Dose 4D | Helical Scan | 1.2 | 1.0 | 1.0 | B30f | 300-400 | 512×512 |
| Anke,  ANATOM 32 Fit Es | 120 | ATCM | Helical Scan | 1.4 | 1.25 | 1.25 | Standard | 300-400 | 512×512 |
| SIEMENS,  SOMATOM Perspective | 130 | ATCM,  CARE Dose 4D | Helical Scan | 1.2 | 1.0 | 1.0 | I31s | 300-400 | 512×512 |
| UIH,  uCT 760 | 120 | ATCM | Helical Scan | 1.0 | 1.0 | 1.0 | B SOFT B | 300-400 | 512×512 |
| NMS,  NeuViz 128 | 120 | ATCM, | Helical Scan | 1.0 | 1.0 | 1.0 | F20 | 300-400 | 512×512 |
| JSHTCM | SIEMENS,  SOMATOM Definition AS+ | 120 | ATCM,  CARE Dose 4D | Helical Scan | 1.2 | 1.0 | 1.0 | I31f | 300-400 | 512×512 |
| NBH | SIEMENS,  SOMATOM Definition AS+ | 120 | ATCM,  CARE Dose 4D | Helical Scan | 1.2 | 1.0 | 1.0 | B31f | 300-400 | 512×512 |
| GE,  Optima CT660 | 120 | ATCM,  Auto mA | Helical Scan | 1.0 | 1.0 | 1.0 | Standard | 300-400 | 512×512 |

**Abbreviations:** NJU, Affiliated Jinling Hospital, Medical School of Nanjing University; JSHTCM, Jiangsu Province Hospital of Chinese Medicine; NBH, the Affiliated Brain Hospital of Nanjing Medical University; SIEMENS, Siemens Healthineers; UIH, United Imaging Healthcare; NMS, Neusoft Medical Systems(Neusoft Corporation); GE, General Electric Company; ATCM, Automated Tube Current Modulation; Recon FOV, Reconstruction Field of View.

**Supplementary Reference**

1. Wang, J. G. Chinese guidelines for the prevention and treatment of hypertension (2024 revision). *J Geriatr Cardiol* **22**, 1-149 (2025).

2. Bernstein, C. N. et al. World gastroenterology organisation global guidelines inflammatory bowel disease: Update August 2015. *J Clin Gastroenterol* **50**, 803-818 (2016).

3. First, M. B. Diagnostic and statistical manual of mental disorders, 5th edition, and clinical utility. *J Nerv Ment Dis* **201**, 727-729 (2013).

4. Liu, L. et al. Chinese stroke association guidelines for clinical management of ischaemic cerebrovascular diseases: executive summary and 2023 update. *Stroke Vasc Neurol* **8**, e3 (2023).
